# Supplementary material for: The Impact of Alcohol and Other Substance Use Disorders on Mortality in Patients With Eating Disorders: A Nationwide Register-Based Retrospective Cohort Study
Source: Atypon-hosted journal article supplement (doi:10.1176/appi.ajp.2021.21030274), 2022-01-01
Supplement: appi.ajp.2021.21030274.ds001.pdf [file appi.ajp.2021.21030274.ds001.pdf]

Data supplement for Mellentin et al., The Impact of Alcohol and Other Substance Use Disorders on Mortality in Patients With Eating Disorders: A Nationwide Register-Based Retrospective Cohort Study. *Am J Psychiatry* (doi: 10.1176/appi.ajp.2021.21030274)

### Recategorized variables

#### *Highest achieved education*

Highest completed education at the match date was extracted from the Danish education registers (Jensen VM, Rasmussen AW. Danish Education Registers. *Scand J Public Health*. 2011;39(7 Suppl):91-4).

The original categories can be seen here:

<https://www.dst.dk/da/Statistik/dokumentation/Times/moduldata-for-uddannelse-og-kultur/hfaudd>.

We reclassified highest achieved education into four groups corresponding to the following levels of the International Standard Classification of Education (ISCED 2011): 0–2 (pre-primary, primary and lower secondary education), 3–4 (upper secondary education), 5–6 (Short cycle tertiary/bachelor or equivalent) and 7–8 (Master/PhD or equivalent). The reclassification from is defined and provided by Statistics Denmark.

#### *Employment status*

Employment status was gathered at match date from the Employment Classification Module of the Danish Income Statistics Register (Baadsgaard M, Quitzau J. Danish registers on personal income and transfer payments. *Scandinavian Journal of Public Health*. 2011;39(7\_suppl):103-5.), which contains the employment status, “where each person is classified by occupation based on their most important source of income of the year. It is determined whether a person is employed, unemployed or outside the labour force seen as a yearly consideration.” (citation from the article). The original categories can be seen here:

<https://www.dst.dk/da/Statistik/dokumentation/Times/personindkomst/socio13>.

We recategorized employment status into Employed (full or part time) Unemployed Student ( $\geq$  18 years) Retired Unknown.

SOCIO13<200 =employed

Socio13 in 210, 220, 330 unemployed

Socio13 in 420, 310 then student

Socio13 in 321, 322, 323 then retired

Other>18 years other/missing (own category)

Children at match time were not considered in this classification.

*Civil status*

Information on civil status was accessed from the Danish Civil Registration System (Pedersen CB. The Danish Civil Registration System. Scand J Public Health. 2011;39(7 Suppl):22-5.)

The original categories can be seen here:

<https://www.dst.dk/da/Statistik/dokumentation/Times/cpr-oplysninger/familier-og-husstande/familie-type>)

We classified 1,2,3,4,7,8 to cohabiting, 5,10,9 to single, <18 years to child.

**TABLE S1.** Risk of all-cause and cause-specific mortality in eating disorder patients and matched control subjects with substance use disorder (SUDs) compared with eating disorder patients and matched control subjects without SUDs (sensitivity analysis)<sup>a</sup>

| SUD status                        | All-cause mortality                |             |        | Deaths from external causes           |              |        | Deaths from internal causes           |             |        |
|-----------------------------------|------------------------------------|-------------|--------|---------------------------------------|--------------|--------|---------------------------------------|-------------|--------|
|                                   | Adjusted Hazard Ratio <sup>c</sup> | 95% CI      | p      | Adjusted Subhazard Ratio <sup>c</sup> | 95% CI       | p      | Adjusted Subhazard Ratio <sup>c</sup> | 95% CI      | p      |
| No SUD                            | 1                                  |             |        | 1                                     |              |        | 1                                     |             |        |
| Alcohol only                      | 7.31                               | 5.36, 9.98  | <0.001 | 9.21                                  | 5.38, 15.76  | <0.001 | 6.50                                  | 4.41, 9.58  | <0.001 |
| Cannabis only                     | 2.37                               | 1.22, 4.63  | 0.0113 | 5.18                                  | 2.25, 11.97  | <0.001 | 1.24                                  | 0.40, 3.85  | 0.7149 |
| Hard drugs only                   | 7.49                               | 5.20, 10.78 | <0.001 | 18.89                                 | 12.13, 29.41 | <0.001 | 2.39                                  | 1.12, 5.11  | 0.0247 |
| Alcohol and cannabis              | 2.07                               | 0.51, 8.46  | 0.3095 | 3.62                                  | 0.49, 26.58  | 0.2066 | 1.56                                  | 0.22, 11.18 | 0.6561 |
| Alcohol and hard drugs            | 9.31                               | 6.06, 14.31 | <0.001 | 20.37                                 | 11.50, 36.07 | <0.001 | 4.37                                  | 2.12, 9.05  | <0.001 |
| Cannabis and hard drugs           | 6.27                               | 3.75, 10.48 | <0.001 | 13.73                                 | 7.31, 25.81  | <0.001 | 0.61                                  | 0.08, 4.39  | 0.6225 |
| Alcohol, cannabis, and hard drugs | 9.91                               | 6.27, 15.67 | <0.001 | 24.10                                 | 13.63, 42.61 | <0.001 | 3.55                                  | 1.43, 8.78  | 0.0061 |

<sup>a</sup> Eating disorder patients, N=20,759; Control subjects, N=83,036. For case status, eating disorder patients were coded 1 and control subjects were coded 0.

<sup>b</sup> The hard drugs category includes heroin and other opioids, sedative-hypnotics, cocaine and other stimulants, multiple substances, and other psychoactive substances (e.g., hallucinogens, volatile solvents, and designer drugs).

<sup>c</sup> Adjusted for age at the index date, sex, and birth year.

**TABLE S2.** Risk of all-cause mortality in AN, BN, and USED patients/respective matched controls with SUD compared to AN, BN, and USED patients/respective matched controls without SUD (sensitivity analysis)<sup>a</sup>

| Eating Disorder and SUD Status <sup>b</sup>                     | All-cause mortality                |             |        |
|-----------------------------------------------------------------|------------------------------------|-------------|--------|
|                                                                 | Adjusted Hazard Ratio <sup>c</sup> | 95% CI      | p      |
| <b>Anorexia nervosa</b>                                         |                                    |             |        |
| No SUD                                                          | 1                                  |             |        |
| Alcohol and/or cannabis                                         | 5.95                               | 3.76, 9.41  | <0.001 |
| Hard drugs alone or in combination with alcohol and/or cannabis | 9.70                               | 6.62, 14.22 | <0.001 |
| <b>Bulimia nervosa</b>                                          |                                    |             |        |
| No SUD                                                          | 1                                  |             |        |
| Alcohol and/or cannabis                                         | 7.87                               | 4.64, 13.35 | <0.001 |
| Hard drugs alone or in combination with alcohol and/or cannabis | 12.58                              | 8.09, 19.55 | <0.001 |
| <b>Unspecified eating disorder</b>                              |                                    |             |        |
| No SUD                                                          | 1                                  |             |        |
| Alcohol and/or cannabis                                         | 3.53                               | 2.18, 5.70  | <0.001 |
| Hard drugs alone or in combination with alcohol and/or cannabis | 4.40                               | 2.91, 6.65  | <0.001 |

<sup>a</sup> AN patients, N=8,108; AN controls, N=32,432; BN patients, N=5,485; BN controls, N=21,940; USED patients, N=7,166; USED controls, N=28,664. For case status for each of the eating disorder categories, the eating disorder patients with SUD were coded as 1 and eating disorder control subjects were coded as 0.

<sup>b</sup> The hard drugs category includes heroin and other opioids, sedative-hypnotics, cocaine and other stimulants, multiple substances, and other psychoactive substances (e.g., hallucinogens, volatile solvents, and designer drugs).

<sup>c</sup> Adjusted for age at index date, sex, and birth year.
